# Supplementary material for: Association of PCSK9 plasma levels with metabolic patterns and coronary atherosclerosis in patients with stable angina
Source: Springer Nature journal article supplement (doi:10.1186/s12933-019-0949-3), 2019-10-31
Supplement: MOESM1 [file 17336616]

**ADDITIONAL FILE 1.**

**Table S1: Clinical characteristics of study population relative to PCSK9 quartiles**

|                                    | <b>Total Population<br/>n=539</b> | <b>Quartile I<br/>&lt;138 ng/L<br/>n=135</b> | <b>Quartile II<br/>138-183.8<br/>ng/L<br/>n=135</b> | <b>Quartile III<br/>183.9-264 ng/L<br/>n=135</b> | <b>Quartile IV<br/>&gt;264 ng/L<br/>n=134</b> | <b>P<br/>value</b> |
|------------------------------------|-----------------------------------|----------------------------------------------|-----------------------------------------------------|--------------------------------------------------|-----------------------------------------------|--------------------|
| <b>Demographics</b>                |                                   |                                              |                                                     |                                                  |                                               |                    |
| Age, years                         | 60±9                              | 61±9                                         | 58±10                                               | 62±8                                             | 61±8                                          | ns                 |
| Male gender                        | 326 (60)                          | 88 (65)                                      | 82 (61)                                             | 84 (62)                                          | 72 (58)                                       | ns                 |
| <b>Clinical characteristics</b>    |                                   |                                              |                                                     |                                                  |                                               |                    |
| Typical angina                     | 140 (26)                          | 30 (22)                                      | 34 (25)                                             | 32 (24)                                          | 44 (33)                                       |                    |
| Atypical angina                    | 321 (60)                          | 78 (58)                                      | 87 (64)                                             | 79 (58)                                          | 77 (57)                                       |                    |
| Non-anginal chest pain             | 78 (14)                           | 27 (20)                                      | 14 (10)                                             | 24 (18)                                          | 13 (10)                                       |                    |
| LVEF%                              | 60±8                              | 60±9                                         | 60±9                                                | 59±9                                             | 61±7                                          | ns                 |
| Pre-test probability of CAD        | 48±19                             | 48±18                                        | 47±19                                               | 49±19                                            | 49±20                                         | ns                 |
| <b>Cardiovascular risk factors</b> |                                   |                                              |                                                     |                                                  |                                               |                    |
| Family history of CAD              | 189 (35)                          | 40 (30)                                      | 48 (36)                                             | 42 (31)                                          | 59 (44)                                       | 0.0596             |
| Diabetes                           | 181 (34)                          | 44 (33)                                      | 53 (39)                                             | 45 (33)                                          | 39 (29)                                       | ns                 |
| Hypercholesterolemia               | 322 (60)                          | 77 (57)                                      | 82 (61)                                             | 81 (60)                                          | 82 (61)                                       | ns                 |
| Hypertension                       | 360 (67)                          | 88 (65)                                      | 93 (69)                                             | 88 (65)                                          | 91 (68)                                       | ns                 |
| Smoking                            | 133 (25)                          | 30 (22)                                      | 42 (31)                                             | 27 (20)                                          | 34 (25)                                       | ns                 |
| BMI, kg/m <sup>2</sup>             | 27.7±4.3                          | 27.9±4.0                                     | 28.2±4.1                                            | 27.7±4.5                                         | 26.8±4.6                                      | ns                 |
| Metabolic Syndrome                 | 185 (34)                          | 54 (40)                                      | 54 (40)                                             | 46 (34)                                          | 31 (23)                                       | 0.0102             |
| <b>Pharmacological therapies</b>   |                                   |                                              |                                                     |                                                  |                                               |                    |
| Beta-blockers                      | 215 (40)                          | 64 (47)                                      | 51 (38)                                             | 54 (40)                                          | 46 (34)                                       | ns                 |
| Calcium channel blockers           | 74 (14)                           | 21 (16)                                      | 16 (12)                                             | 16 (12)                                          | 21 (15)                                       | ns                 |
| ACE Inhibitors                     | 166 (31)                          | 43 (32)                                      | 39 (29)                                             | 48 (36)                                          | 36 (27)                                       | ns                 |
| ARBs                               | 91 (17)                           | 23 (17)                                      | 26 (19)                                             | 27 (13)                                          | 25 (19)                                       | ns                 |
| Diuretics                          | 93 (17)                           | 27 (20)                                      | 24 (18)                                             | 20 (15)                                          | 22 (16)                                       | ns                 |
| Anti-diabetic                      | 98 (18)                           | 25 (19)                                      | 30 (22)                                             | 25 (18)                                          | 18 (13)                                       | ns                 |
| Statins                            | 279 (52)                          | 72 (53)                                      | 77 (57)                                             | 71 (53)                                          | 59 (44)                                       | ns                 |
| Aspirin                            | 316 (59)                          | 94 (70)                                      | 66 (49)                                             | 81 (60)                                          | 75 (56)                                       | 0.0058             |
| Anti-coagulants                    | 11 (2)                            | 2 (1)                                        | 3 (2)                                               | 2 (1)                                            | 4 (3)                                         | ns                 |

Continuous variables are presented as mean ± standard deviation, categorical variables as absolute N and (%).

**Table S2. Bio-humoral characteristics of clinical population relative to PCSK9 quartiles.**

|                                                 | <b>Total Population<br/>n=412</b> | <b>Quartile I<br/>&lt;136 ng/L<br/>n=103</b> | <b>Quartile II<br/>136-183.8 ng/L<br/>n=206</b> | <b>Quartile III<br/>183.9-264 ng/L<br/>n=206</b> | <b>Quartile IV<br/>&gt;264 ng/L<br/>n=103</b> | <b>P<br/>value</b> |
|-------------------------------------------------|-----------------------------------|----------------------------------------------|-------------------------------------------------|--------------------------------------------------|-----------------------------------------------|--------------------|
| <b>Renal</b>                                    |                                   |                                              |                                                 |                                                  |                                               |                    |
| Creatinine, mg/dL                               | 0.88±0.23                         | 0.91±0.27                                    | 0.87±0.24                                       | 0.88±0.21                                        | 0.86±0.19                                     | ns                 |
| <b>Hepatic</b>                                  |                                   |                                              |                                                 |                                                  |                                               |                    |
| AST, IU/L                                       | 24±10                             | 24±11                                        | 23±7                                            | 26±11                                            | 26±9                                          | 0.0062             |
| ALT, IU/L                                       | 21±13                             | 19±11                                        | 19±11                                           | 22±16                                            | 22±13                                         | 0.0111             |
| ALP, IU/L                                       | 51±18                             | 47±17                                        | 47±17                                           | 51±15                                            | 60±20                                         | <0.0001            |
| <b>Metabolic (glucose)</b>                      |                                   |                                              |                                                 |                                                  |                                               |                    |
| FPG, mg/dL                                      | 112±35                            | 109±30                                       | 117±43                                          | 116±38                                           | 109±29                                        | ns                 |
| †FPG ≥ 100 mg/dL                                | 339 (63)                          | 82 (61)                                      | 81 (60)                                         | 93 (69)                                          | 83 (62)                                       | ns                 |
| Insulin, µUI/mL                                 | 11.5±10.8                         | 13.3±12.5                                    | 12.6±12.2                                       | 10.0±7.2                                         | 10.3±10.1                                     | 0.0344*            |
| HOMA index                                      | 3.4±4.1                           | 3.9±4.5                                      | 4.0±5.2                                         | 2.9±2.6                                          | 2.9±3.2                                       | 0.0566*            |
| <b>Metabolic (lipid)</b>                        |                                   |                                              |                                                 |                                                  |                                               |                    |
| Total cholesterol, mg/dL                        | 183±49                            | 171±43                                       | 179±46                                          | 182±44                                           | 201±55                                        | <0.0001            |
| LDL, mg/dL                                      | 106±40                            | 100±37                                       | 103±38                                          | 105±38                                           | 118±45                                        | 0.0043             |
| HDL, mg/dL                                      | 53±17                             | 47±13                                        | 51±16                                           | 52±14                                            | 61±19                                         | <0.0001            |
| †HDL ≤ 40 mg/dL, male or HDL ≤ 50 mg/dL, female | 160 (30)                          | 60 (44)                                      | 47 (34)                                         | 34 (26)                                          | 19 (14)                                       | <0.0001            |
| Apo A1, mg/dL                                   | 143±32                            | 132±32                                       | 139±32                                          | 148±27                                           | 155±35                                        | <0.0001            |
| Apo B, mg/dL                                    | 87±28                             | 82±28                                        | 86±26                                           | 88±27                                            | 93±29                                         | 0.0048             |
| Lipoprotein (a)                                 | 21.3±23.2                         | 16.1±18.3                                    | 21.6±21.6                                       | 22.9±22.0                                        | 24.6±26.5                                     | 0.0052             |
| Tryglicerides, mg/dL                            | 124±81                            | 125±85                                       | 127±83                                          | 127±89                                           | 118±68                                        | ns                 |
| †Tryglicerides ≥150 mg/dL                       | 131 (24)                          | 34 (25)                                      | 36 (25)                                         | 31 (23)                                          | 30 (23)                                       | ns                 |
| <b>Inflammatory and vascular</b>                |                                   |                                              |                                                 |                                                  |                                               |                    |
| hs-CRP, mg/dL                                   | 0.40±1.09                         | 0.41±0.61                                    | 0.30±0.34                                       | 0.47±1.89                                        | 0.43±0.84                                     | ns                 |
| Interleukin 6, ng/L                             | 1.35±2.53                         | 1.56±2.71                                    | 1.10±1.25                                       | 1.46±3.24                                        | 1.30±1.67                                     | ns                 |
| <b>Adipokines</b>                               |                                   |                                              |                                                 |                                                  |                                               |                    |
| Adiponectin, µg/mL                              | 9.81±6.92                         | 8.11±5.06                                    | 10.21±8.04                                      | 9.74±6.28                                        | 11.19±7.62                                    | 0.0019             |
| Leptin, ng/mL                                   | 9.93±10.66                        | 11.38±13.01                                  | 9.06±8.89                                       | 9.27±9.15                                        | 9.99±10.98                                    | ns                 |

Continuous variables are presented as mean ± standard deviation, categorical variables as absolute N and (%); \* I vs. IV quartile; † criteria of Metabolic Syndrome.

**Table S3. Angiography imaging results relative to PCSK9 groups.**

|                               | <b>CTA Population<br/>(n=412)</b> | <b>Quartile I<br/>&lt;136 ng/L<br/>n=103</b> | <b>Quartile II-III<br/>136-183.8<br/>ng/L<br/>n=103</b> | <b>Quartile III<br/>183.9-266<br/>ng/L<br/>n=103</b> | <b>Quartile IV<br/>&gt;266 ng/L<br/>n=103</b> | <b>P<br/>value</b> |
|-------------------------------|-----------------------------------|----------------------------------------------|---------------------------------------------------------|------------------------------------------------------|-----------------------------------------------|--------------------|
| <b>Obstructive CAD at CTA</b> |                                   |                                              |                                                         |                                                      |                                               |                    |
| Stenosis >50%                 | 144 (35)                          | 40 (39)                                      | 31 (30)                                                 | 40 (38)                                              | 33 (32)                                       | ns                 |
| Stenosis >70%                 | 45 (11)                           | 12 (12)                                      | 12 (12)                                                 | 11 (11)                                              | 10 (10)                                       | ns                 |
| <b>Coronary plaques</b>       |                                   |                                              |                                                         |                                                      |                                               |                    |
| Total N. of plaques           | 3.9±3.8                           | 4.36±3.89                                    | 3.70±3.63                                               | 4.23±3.90                                            | 3.37±3.77                                     | 0.0621*            |
| N. of non-obstructive plaques | 3.03±3.0                          | 3.33±2.89                                    | 2.96±2.89                                               | 3.14±3.31                                            | 2.43±2.93                                     | 0.0323*            |
| N. of obstructive plaques     | 0.9±1.7                           | 0.94±1.57                                    | 0.63±1.43                                               | 0.84±1.43                                            | 0.85±1.87                                     | ns                 |
| N. of calcified plaques       | 0.9±1.7                           | 0.85±1.84                                    | 0.83±1.42                                               | 1.04±1.93                                            | 0.81±1.74                                     | ns                 |
| N. of mixed plaques           | 2.6±3.2                           | 3.14±3.42                                    | 2.45±3.14                                               | 2.54±3.14                                            | 2.19±3.15                                     | 0.0358*            |
| N. of non-calcified plaques   | 0.5±0.9                           | 0.38±0.85                                    | 0.43±0.78                                               | 0.66±1.21                                            | 0.38±0.72                                     | ns                 |
| <b>CTA risk score</b>         | 11.71±11.05                       | 13.17±11.53                                  | 10.88±10.43                                             | 12.77±10.95                                          | 9.99±11.11                                    | 0.0390*            |

Continuous variables are presented as mean ± standard deviation, categorical variables as absolute N and (%); \* I vs. IV quartile.

**Table S4: Univariate analysis of the association between clinical variables and CTA risk score**

|                                    | Univariate analysis |         |
|------------------------------------|---------------------|---------|
|                                    | Coefficient (SE)    | P Value |
| <b>Age</b>                         | 0.067 (0.007)       | <0.0001 |
| <b>Male gender</b>                 | 0.774 (0.131)       | <0.0001 |
| <b>Typical angina</b>              | -0.340 (0.155)      | 0.0288  |
| <b>LVEF</b>                        | -0.022 (0.008)      | 0.0059  |
| <b>Pre-test probability of CAD</b> | 0.005 (0.003)       | 0.0609  |
| <b>Family history of CAD</b>       | -0.298 (0.139)      | 0.0326  |
| <b>Diabetes</b>                    | 0.458 (0.152)       | 0.0028  |
| <b>Hypercholesterolemia</b>        | 0.157 (0.134)       | ns      |
| <b>Hypertension</b>                | 0.478 (0.133)       | 0.0004  |
| <b>Smoking</b>                     | 0.074 (0.152)       | ns      |
| <b>BMI</b>                         | 0.016 (0.017)       | ns      |
| <b>Metabolic Syndrome</b>          | 0.373 (0.152)       | 0.0143  |
| <b>Beta-blockers</b>               | 0.386 (0.134)       | 0.0041  |
| <b>Calcium channel blockers</b>    | 0.380 (0.203)       | ns      |
| <b>ACE Inhibitors</b>              | 0.355 (0.145)       | 0.0146  |
| <b>ARBs</b>                        | 0.386 (0.179)       | 0.0318  |
| <b>Diuretics</b>                   | -0.269 (0.178)      | ns      |
| <b>Anti-diabetic</b>               | 0.0465 (0.167)      | 0.0056  |
| <b>Statins</b>                     | 0.543 (0.130)       | <0.0001 |
| <b>Aspirin</b>                     | 0.535 (0.131)       | <0.0001 |
| <b>Anti-coagulants</b>             | 0.670 (0.156428)    | ns      |

**Table S5: Univariate analysis of the association between biohumoral variables and CTA risk score**

|                          | Univariate analysis |          |
|--------------------------|---------------------|----------|
|                          | Coefficient (SE)    | P Value  |
| <b>Creatinin</b>         | 1.069 (0.599)       | 0.0750   |
| <b>AST</b>               | 0.036 (0.186)       | ns       |
| <b>ALT</b>               | -0.119 (0.138)      | ns       |
| <b>ALP</b>               | -0.083 (0.185)      | ns       |
| <b>Glicemia</b>          | 0.514 (0.259)       | 0.0475   |
| <b>Insulin</b>           | 0.249 (0.086)       | 0.0041   |
| <b>HOMA index</b>        | 0.322 (0.107)       | 0.0029   |
| <b>Total cholesterol</b> | -0.859 (0.244)      | 0.0005   |
| <b>LDL cholesterol</b>   | -0.519 (0.166)      | 0.0019   |
| <b>HDL cholesterol</b>   | -0.829 (0.207)      | < 0.0001 |
| <b>Apo A1</b>            | -0.911 (0.253)      | 0.0004   |
| <b>Apo B</b>             | -0.308 (0.202)      | ns       |
| <b>Lipoprotein (a)</b>   | 0.016 (0.065)       | ns       |
| <b>Triglycerides</b>     | 0.143 (0.121)       | ns       |
| <b>hs-CRP</b>            | 0.0152 (0.036)      | ns       |
| <b>Interleukin-6</b>     | 0.496 (0.137)       | 0.0003   |
| <b>Adiponectin</b>       | -0.118 (0.105)      | ns       |
| <b>Leptin</b>            | -0.318 (0.073)      | <0.0001  |
| <b>PCSK9</b>             | -0.277 (0.135)      | 0.0408   |

**Table S6. Univariate and multivariate analyses of the association between PCSK9 and statins or all drugs.**

|                        | <b>PCSK9</b>    |         |
|------------------------|-----------------|---------|
|                        | Coefficient± SE | P       |
| <b>AST</b>             | 0.202±0.056     | 0.0004  |
| <b>AST + statins</b>   | 0.201±0.056     | 0.0004  |
| <b>AST + all drugs</b> | 0.205±0.057     | 0.0003  |
|                        |                 |         |
|                        | Coefficient± SE | P       |
| <b>ALT</b>             | 0.142±0.042     | 0.0009  |
| <b>ALT + statins</b>   | 0.143±0.042     | 0.0008  |
| <b>ALT + all drugs</b> | 0.142±0.042     | 0.0008  |
|                        |                 |         |
|                        | Coefficient± SE | P       |
| <b>ALP</b>             | 0.389±0.055     | 0.0001  |
| <b>ALP + statins</b>   | 0.387±0.056     | <0.0001 |
| <b>ALP + all drugs</b> | 0.389±0.055     | <0.0001 |

**Table S7. Univariate and multivariate analyses of the association among PCSK9 and hepatic enzymes, risk factors, CTA risk score.**

|                            | <b>PCSK9</b>    |         |
|----------------------------|-----------------|---------|
|                            | Coefficient± SE | P       |
| <b>AST</b>                 | 0.202±0.056     | 0.0004  |
| <b>AST + risk factors*</b> | 0.205±0.056     | 0.0003  |
| <b>AST + CTA score</b>     | 0.183±0.066     | 0.0059  |
|                            |                 |         |
|                            | Coefficient± SE | P       |
| <b>ALT</b>                 | 0.142±0.042     | 0.0009  |
| <b>ALT + risk factors*</b> | 0.157±0.043     | 0.0002  |
| <b>ALT + CTA score</b>     | 0.131±0.050     | 0.0085  |
|                            |                 |         |
|                            | Coefficient± SE | P       |
| <b>ALP</b>                 | 0.389±0.055     | 0.0001  |
| <b>ALP + risk factors*</b> | 0.372±0.057     | <0.0001 |
| <b>ALP + CTA score</b>     | 0.389±0.064     | <0.0001 |

\*Risk factors included Diabetes, Hypecholesterolemia, Hypertriglyceridemia, Obesity, and Metabolic Syndrome
